# Supplementary material
Source: Springer Nature journal article supplement (https://www.springermedizin.de/resource/supplementary/12967_2012_1361_MOESM4_ESM.pdf/9573444)

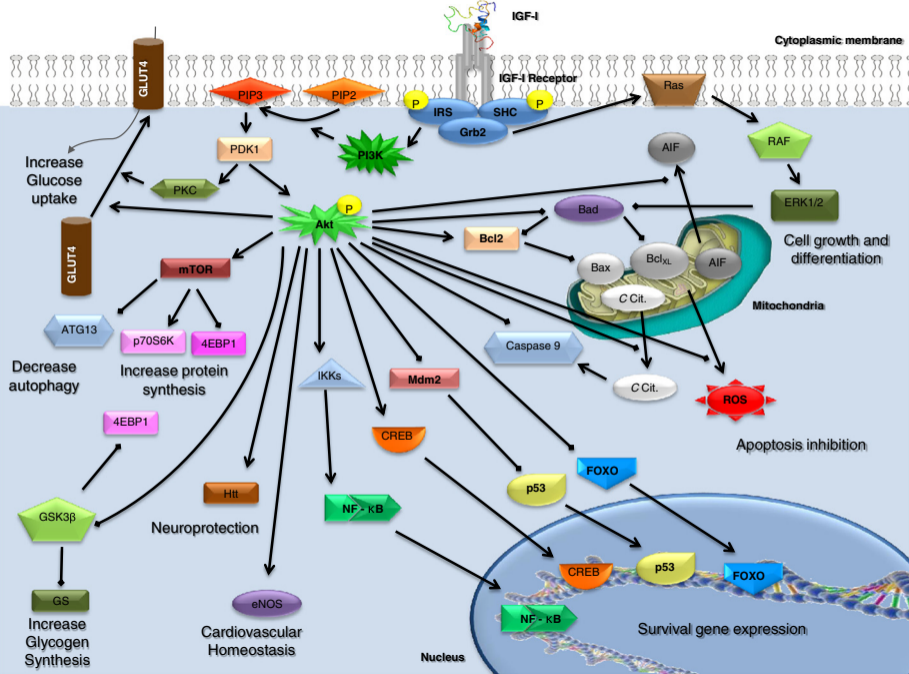

Supplement: MOESM4 [file 9573444]
